# Supplementary material for: Methane-rich biogas production from waste-activated sludge with the addition of ferric chloride under a thermophilic anaerobic digestion system
Source: Royal Society of Chemistry journal article supplement (doi:10.1039/c5ra02362a), 2015-01-01
Supplement: c5ra02362a1.pdf [file c5ra02362a1.pdf]

## Supplementary Information:

### **Methane-rich biogas production from waste activated sludge with the addition of ferric chloride under thermophilic anaerobic digestion system**

Bao Yu<sup>a</sup>, Dongling Zhang<sup>a</sup>, Aidang Shan<sup>a</sup>, Ziyang Lou<sup>a</sup>, Haiping Yuan<sup>a</sup>, Xiaoting Huang<sup>a</sup>, Wenxiang Yuan<sup>b</sup>, Xiaohu Dai<sup>c</sup>, Nanwen Zhu<sup>a,\*</sup>

*<sup>a</sup>School of Environmental Science and Engineering, Shanghai Jiao Tong University, Shanghai 200240, China*

*<sup>b</sup>Shanghai Environmental Sanitation Engineering Design Institute, Shanghai 200232, China*

*<sup>c</sup>National Engineering Research Center for Urban Pollution Control, School of Environmental Science and Engineering, Tongji University, Shanghai 200092, China*

Fig. A1 The ratio of CO<sub>2</sub>/CH<sub>4</sub> during the digestion process.

Fig. A2 Variations of VFAs (including acetic acid, propionic acid, butyric acid, iso-butyric acid, valeric acid and iso-valeric acid) in the reactors during the anaerobic digestion.

Fig. A3 Energy-dispersive spectrometer (EDS) analysis of the sludge samples after dosing different ferric salts.

---

\* Corresponding author. Tel.: +86021 34203710; fax: +86021 34203710.

E-mail address: [nwzhu@sjtu.edu.cn](mailto:nwzhu@sjtu.edu.cn);

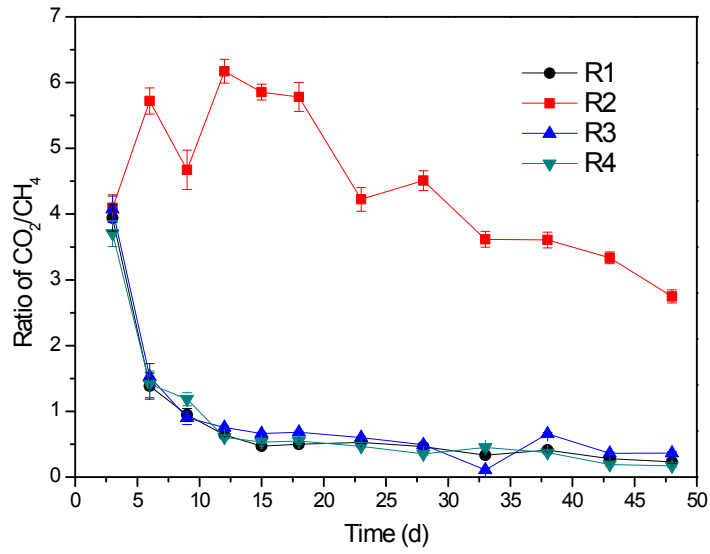

Fig. A.1

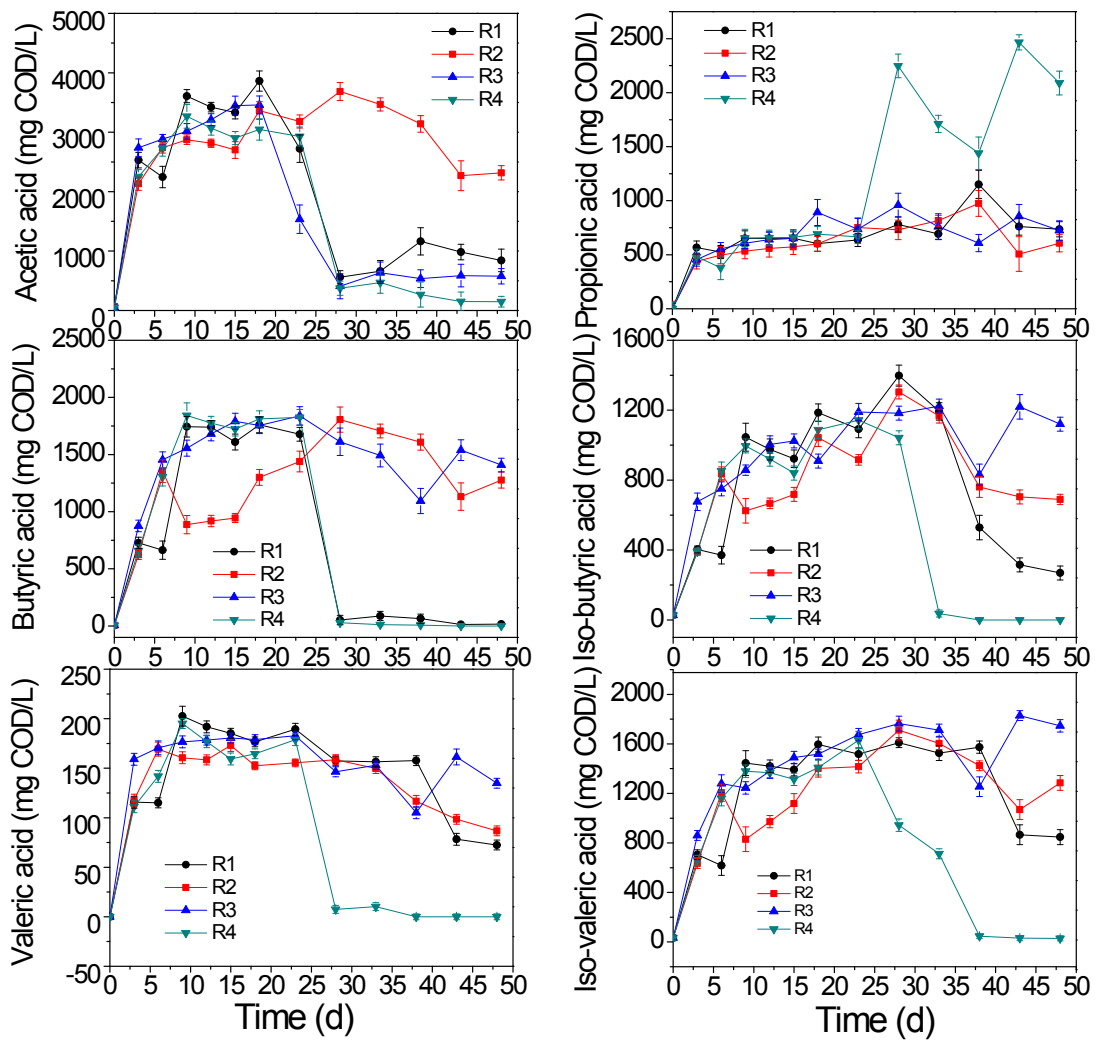

Fig. A.2

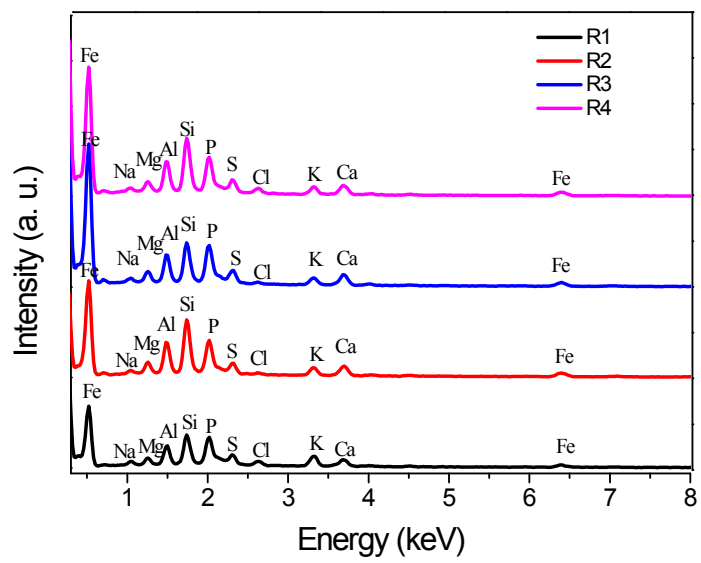

Fig. A.3
